# Supplementary material for: Acquisition of Social Communication Skills in Children with Autism through Applied Behavior Analysis (ABA) Parental Training and Video Modeling
Source: Preprints.org preprint supplement (doi:10.20944/preprints202310.0144.v1), 2023-10-03
Supplement: Supplementary file 2 [file supplementary]

**APPENDIX 1 – Record Sheet Example**

| **NAME:**  **PROGRAM:** **JOINT ATTENTION**  **LEVEL 1 = FULL PHYSICAL PROMPT (FPP)** | **INSTRUCTION**  **Praise the toy, ex: “What a nice toy”, or “ What a nice playdough”**  *** The child must look at the toy, look back at you and turn eye gaze back to the toy** |
| --- | --- |

**FIRST DAY**

**Date:**  **Date:** **Date:** **Date:**

| 1 |  |
| --- | --- |
| 2 |  |
| 3 |  |
| 4 |  |
| 5 |  |
| 6 |  |
| 7 |  |
| 8 |  |
| 9 |  |

| 1 |  |
| --- | --- |
| 2 |  |
| 3 |  |
| 4 |  |
| 5 |  |
| 6 |  |
| 7 |  |
| 8 |  |
| 9 |  |

| 1 |  |
| --- | --- |
| 2 |  |
| 3 |  |
| 4 |  |
| 5 |  |
| 6 |  |
| 7 |  |
| 8 |  |
| 9 |  |

| 1 |  |
| --- | --- |
| 2 |  |
| 3 |  |
| 4 |  |
| 5 |  |
| 6 |  |
| 7 |  |
| 8 |  |
| 9 |  |

**SECOND DAY**

**Date:** **Date:** **Date:** **Date:**

| 1 |  |
| --- | --- |
| 2 |  |
| 3 |  |
| 4 |  |
| 5 |  |
| 6 |  |
| 7 |  |
| 8 |  |
| 9 |  |

| 1 |  |
| --- | --- |
| 2 |  |
| 3 |  |
| 4 |  |
| 5 |  |
| 6 |  |
| 7 |  |
| 8 |  |
| 9 |  |

| 1 |  |
| --- | --- |
| 2 |  |
| 3 |  |
| 4 |  |
| 5 |  |
| 6 |  |
| 7 |  |
| 8 |  |
| 9 |  |

| 1 |  |
| --- | --- |
| 2 |  |
| 3 |  |
| 4 |  |
| 5 |  |
| 6 |  |
| 7 |  |
| 8 |  |
| 9 |  |

**THIRD DAY**

**Date:** **Date:** **Date:** **Date:**

| 1 |  |
| --- | --- |
| 2 |  |
| 3 |  |
| 4 |  |
| 5 |  |
| 6 |  |
| 7 |  |
| 8 |  |
| 9 |  |

| 1 |  |
| --- | --- |
| 2 |  |
| 3 |  |
| 4 |  |
| 5 |  |
| 6 |  |
| 7 |  |
| 8 |  |
| 9 |  |

| 1 |  |
| --- | --- |
| 2 |  |
| 3 |  |
| 4 |  |
| 5 |  |
| 6 |  |
| 7 |  |
| 8 |  |
| 9 |  |

| 1 |  |
| --- | --- |
| 2 |  |
| 3 |  |
| 4 |  |
| 5 |  |
| 6 |  |
| 7 |  |
| 8 |  |
| 9 |  |

**FORTH DAY:**

**Date:** **Date:** **Date:** **Date:**

| 1 |  |
| --- | --- |
| 2 |  |
| 3 |  |
| 4 |  |
| 5 |  |
| 6 |  |
| 7 |  |
| 8 |  |
| 9 |  |

| 1 |  |
| --- | --- |
| 2 |  |
| 3 |  |
| 4 |  |
| 5 |  |
| 6 |  |
| 7 |  |
| 8 |  |
| 9 |  |

| 1 |  |
| --- | --- |
| 2 |  |
| 3 |  |
| 4 |  |
| 5 |  |
| 6 |  |
| 7 |  |
| 8 |  |
| 9 |  |

| 1 |  |
| --- | --- |
| 2 |  |
| 3 |  |
| 4 |  |
| 5 |  |
| 6 |  |
| 7 |  |
| 8 |  |
| 9 |  |

**EXAMPLES OF FILLED RECORD SHEETS**

| **NAME:**  **PROGRAM: JOINT ATTENTION**  **LEVEL 2 = PARTIAL PHYSICAL PROMPT (PPP)** | **INSTRUCTION**  **Praise the toy, ex: “What a nice toy”, or “ What a nice playdough”**  *** The child must look at the toy, look back at you and turn eye gaze back to the toy** |
| --- | --- |

**FIRST DAY**

**Date:** 07/27/2014 **Date:** 07/27/2014 **Date:** 07/27/2014 **Date:** 07/27/2014

| 1 | PPP |
| --- | --- |
| 2 | FPP |
| 3 | PPP |
| 4 | PPP |
| 5 | PPP |
| 6 | FPP |
| 7 | FPP |
| 8 | FPP |
| 9 | PPP |

| 1 | PPP |
| --- | --- |
| 2 | FPP |
| 3 | FPP |
| 4 | PPP |
| 5 | FPP |
| 6 | PPP |
| 7 | PPP |
| 8 | PPP |
| 9 | PPP |

| 1 | PPP |
| --- | --- |
| 2 | FPP |
| 3 | PPP |
| 4 | PPP |
| 5 | PPP |
| 6 | FPP |
| 7 | FPP |
| 8 | PPP |
| 9 | PPP |

| 1 | PPP |
| --- | --- |
| 2 | PPP |
| 3 | FPP |
| 4 | PPP |
| 5 | PPP |
| 6 | FPP |
| 7 | FPP |
| 8 | FPP |
| 9 | PPP |

**SECOND DAY**

**Date:** 07/28/2014 **Date:** 07/28/2014  **Date:** 07/28/2014  **Date:** 07/28/2014

| 1 | PPP |
| --- | --- |
| 2 | PPP |
| 3 | FPP |
| 4 | FPP |
| 5 | PPP |
| 6 | PPP |
| 7 | FPP |
| 8 | FPP |
| 9 | PPP |

| 1 | PPP |
| --- | --- |
| 2 | FPP |
| 3 | FPP |
| 4 | FPP |
| 5 | PPP |
| 6 | FPP |
| 7 | PPP |
| 8 | PPP |
| 9 | PPP |

| 1 | PPP |
| --- | --- |
| 2 | FPP |
| 3 | PPP |
| 4 | FPP |
| 5 | PPP |
| 6 | FPP |
| 7 | FPP |
| 8 | PPP |
| 9 | PPP |

| 1 | PPP |
| --- | --- |
| 2 | FPP |
| 3 | FPP |
| 4 | PPP |
| 5 | PPP |
| 6 | FPP |
| 7 | PPP |
| 8 | PPP |
| 9 | PPP |

**THIRD DAY**

**Date:** 07/29/2014 **Date:** 07/29/2014  **Date:** 07/29/2014  **Date:** 07/29/2014

| 1 | PPP |
| --- | --- |
| 2 | FPP |
| 3 | PPP |
| 4 | FPP |
| 5 | PPP |
| 6 | PPP |
| 7 | PPP |
| 8 | PPP |
| 9 | PPP |

| 1 | PPP |
| --- | --- |
| 2 | FPP |
| 3 | PPP |
| 4 | FPP |
| 5 | PPP |
| 6 | PPP |
| 7 | PPP |
| 8 | PPP |
| 9 | PPP |

| 1 | PPP |
| --- | --- |
| 2 | FPP |
| 3 | PPP |
| 4 | PPP |
| 5 | FPP |
| 6 | PPP |
| 7 | PPP |
| 8 | PPP |
| 9 | PPP |

| 1 | PPP |
| --- | --- |
| 2 | PPP |
| 3 | PPP |
| 4 | PPP |
| 5 | PPP |
| 6 | FPP |
| 7 | FPP |
| 8 | PPP |
| 9 | PPP |

**FORTH DAY**

**Date:** 07/30/2014 **Date:** 07/30/2014  **Date:** 07/30/2014  **Date:** 07/30/2014

| 1 | PPP |
| --- | --- |
| 2 | PPP |
| 3 | PPP |
| 4 | PPP |
| 5 | FPP |
| 6 | FPP |
| 7 | PPP |
| 8 | PPP |
| 9 | PPP |

| 1 | PPP |
| --- | --- |
| 2 | PPP |
| 3 | FPP |
| 4 | PPP |
| 5 | PPP |
| 6 | FPP |
| 7 | PPP |
| 8 | PPP |
| 9 | PPP |

| 1 | PPP |
| --- | --- |
| 2 | PPP |
| 3 | PPP |
| 4 | FPP |
| 5 | PPP |
| 6 | PPP |
| 7 | PPP |
| 8 | PPP |
| 9 | PPP |

| 1 | PPP |
| --- | --- |
| 2 | FPP |
| 3 | PPP |
| 4 | PPP |
| 5 | PPP |
| 6 | PPP |
| 7 | PPP |
| 8 | PPP |
| 9 | PPP |

| **NAME:**  **PROGRAM:** **JOINT ATTENTION**  **LEVEL 3 = GESTURAL PROMPT (GP)** | **INSTRUCTION**  **Praise the toy, ex: “What a nice toy”, or “ What a nice playdough”**  *** The child must look at the toy, look back at you and turn eye gaze back to the toy** |
| --- | --- |

**FIRST DAY**

**Date:** 10/01/2014 **Date:** 10/01/2014  **Date:** 10/01/2014  **Date:** 10/01/2014

| 1 | GP |
| --- | --- |
| 2 | PPP |
| 3 | GP |
| 4 | GP |
| 5 | PPP |
| 6 | FPP |
| 7 | GP |
| 8 | PPP |
| 9 | FPP |

| 1 | GP |
| --- | --- |
| 2 | GP |
| 3 | PPP |
| 4 | PPP |
| 5 | FPP |
| 6 | GP |
| 7 | GP |
| 8 | PPP |
| 9 | GP |

| 1 | GP |
| --- | --- |
| 2 | GP |
| 3 | PPP |
| 4 | FPP |
| 5 | PPP |
| 6 | GP |
| 7 | GP |
| 8 | GP |
| 9 | GP |

| 1 | GP |
| --- | --- |
| 2 | GP |
| 3 | GP |
| 4 | GP |
| 5 | GP |
| 6 | PPP |
| 7 | FPP |
| 8 | PPP |
| 9 | FPP |

**SECOND DAY**

**Date:** 10/02/2014 **Date:** 10/02/2014  **Date:** 10/02/2014  **Date:** 10/02/2014

| 1 | GP |
| --- | --- |
| 2 | GP |
| 3 | GP |
| 4 | GP |
| 5 | PPP |
| 6 | FPP |
| 7 | GP |
| 8 | PPP |
| 9 | GP |

| 1 | GP |
| --- | --- |
| 2 | GP |
| 3 | GP |
| 4 | PPP |
| 5 | PPP |
| 6 | FPP |
| 7 | GP |
| 8 | PPP |
| 9 | GP |

| 1 | GP |
| --- | --- |
| 2 | PPP |
| 3 | FPP |
| 4 | GP |
| 5 | GP |
| 6 | PPP |
| 7 | FPP |
| 8 | GP |
| 9 | GP |

| 1 | GP |
| --- | --- |
| 2 | GP |
| 3 | GP |
| 4 | PPP |
| 5 | GP |
| 6 | PPP |
| 7 | GP |
| 8 | GP |
| 9 | GP |

**THIRD DAY**

**Date:** 10/03/2014 **Date:** 10/03/2014  **Date:** 10/03/2014  **Date:** 10/03/2014

| 1 | GP |
| --- | --- |
| 2 | GP |
| 3 | GP |
| 4 | PPP |
| 5 | GP |
| 6 | GP |
| 7 | GP |
| 8 | GP |
| 9 | GP |

| 1 | GP |
| --- | --- |
| 2 | GP |
| 3 | GP |
| 4 | GP |
| 5 | PPP |
| 6 | GP |
| 7 | PPP |
| 8 | GP |
| 9 | GP |

| 1 | GP |
| --- | --- |
| 2 | GP |
| 3 | PPP |
| 4 | FPP |
| 5 | GP |
| 6 | GP |
| 7 | GP |
| 8 | GP |
| 9 | GP |

| 1 | GP |
| --- | --- |
| 2 | GP |
| 3 | GP |
| 4 | GP |
| 5 | GP |
| 6 | GP |
| 7 | GP |
| 8 | PPP |
| 9 | GP |

**FORTH DAY**

**Date:** 10/04/2014 **Date:** 10/04/2014  **Date:** 10/04/2014  **Date:** 10/04/2014

| 1 | GP |
| --- | --- |
| 2 | GP |
| 3 | GP |
| 4 | PPP |
| 5 | GP |
| 6 | GP |
| 7 | GP |
| 8 | GP |
| 9 | GP |

| 1 | GP |
| --- | --- |
| 2 | GP |
| 3 | GP |
| 4 | GP |
| 5 | PPP |
| 6 | GP |
| 7 | GP |
| 8 | GP |
| 9 | GP |

| 1 | GP |
| --- | --- |
| 2 | GP |
| 3 | GP |
| 4 | GP |
| 5 | GP |
| 6 | GP |
| 7 | PPP |
| 8 | GP |
| 9 | GP |

| 1 | GP |
| --- | --- |
| 2 | GP |
| 3 | GP |
| 4 | GP |
| 5 | PPP |
| 6 | GP |
| 7 | GP |
| 8 | GP |
| 9 | GP |
